# Supplementary material for: Enhanced acidity of defective MOF-808: effects of the activation process and missing linker defects
Source: Royal Society of Chemistry journal article supplement (doi:10.1039/c7cy02462b), 2018-01-01
Supplement: c7cy02462b1.pdf [file c7cy02462b1.pdf]

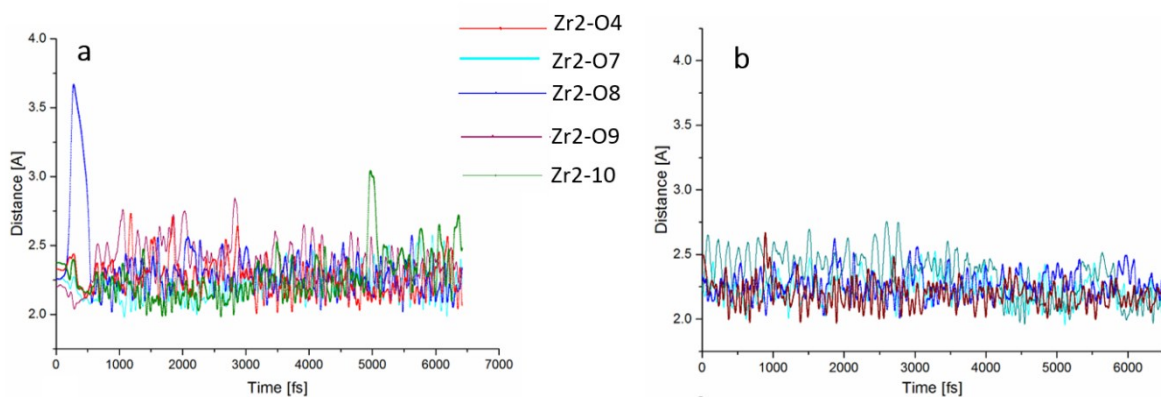

**Figure S1.** Zr2 ...O distance changes in defect-free structure (a) initial steps (b) after removal of surrounding water molecules at 383 K.

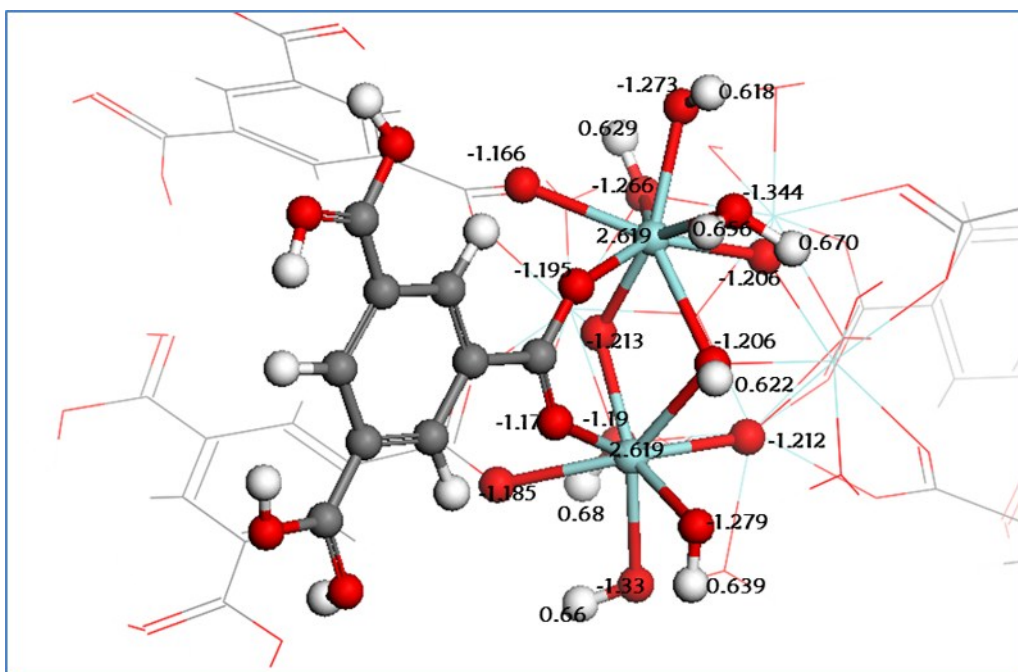

**Figure S2.** Bader charge of the initial defect-free cluster.

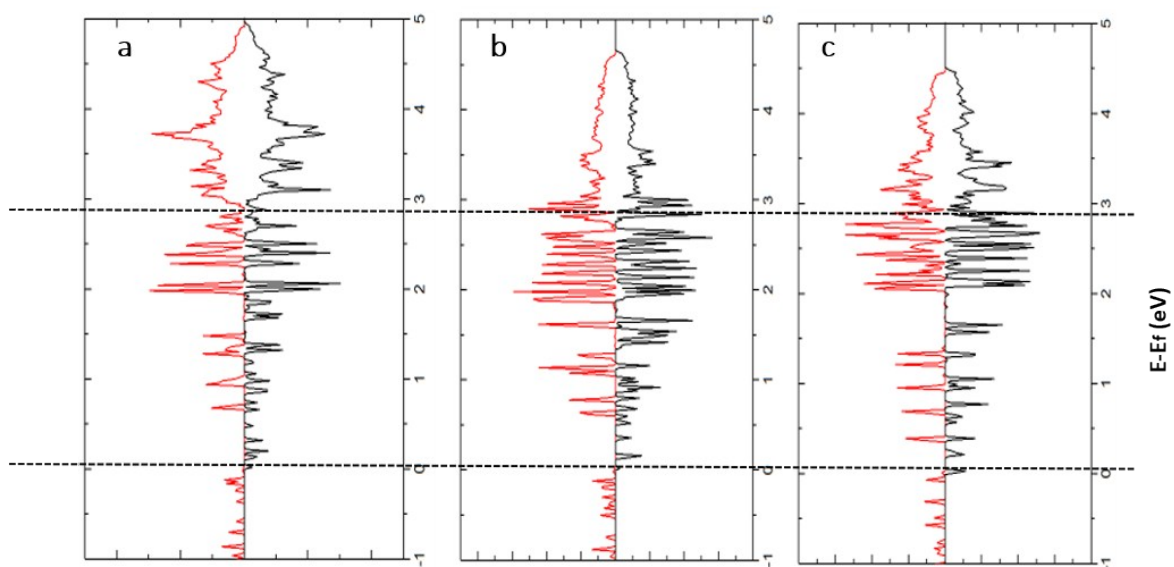

**Figure S3.** Total DOS of (a) hydroxylated-defect free, (b) dehydroxylated-defect free, and (c) dehydroxylated defect **MOF 808** structures. The defect-free MOF808 exhibits inherently six missing linker defects per cluster.

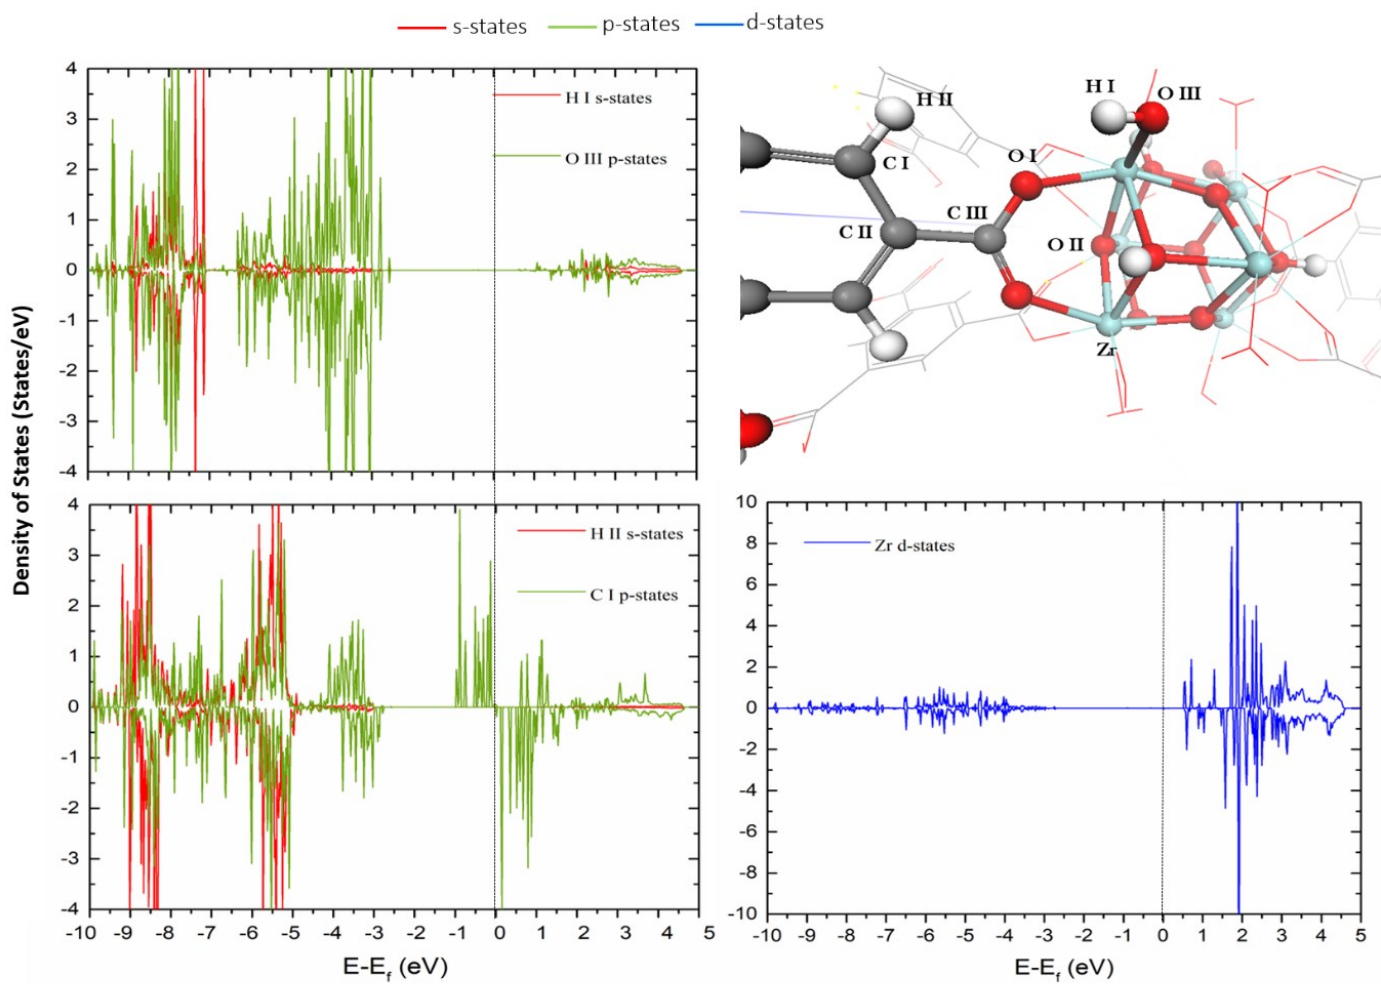

**Figure S4.** Nomenclature used for the studied carbon, oxygen and hydrogen atoms. States overlapping supporting covalent bonding and d-states of zirconium atoms.

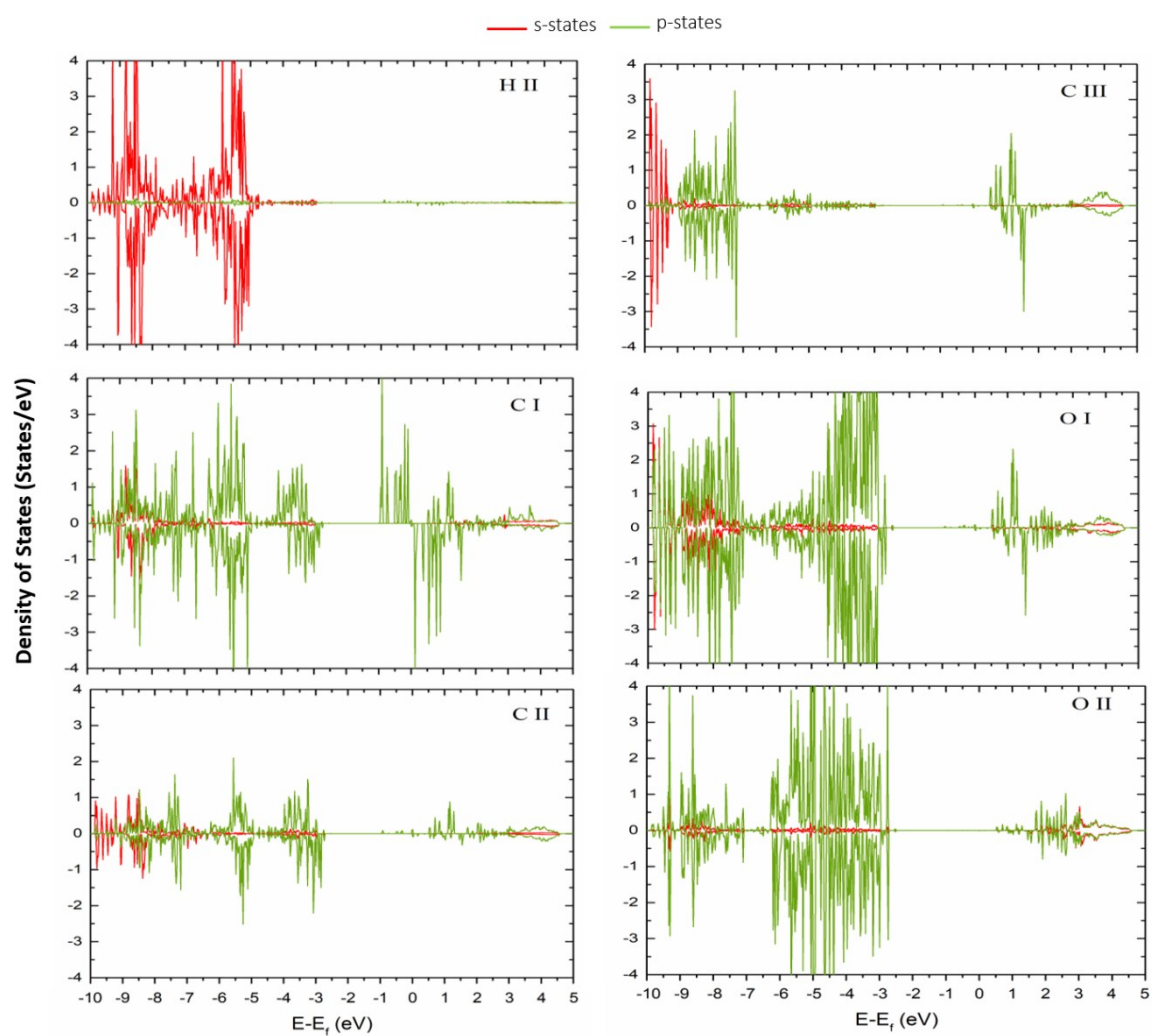

**Figure S5.** Partial density of states of the defect-free structure after activation process.
